# Supplementary material for: Zinc release of Zn7-metallothionein-3 induces fibrillar type amyloid-β aggregates
Source: Royal Society of Chemistry journal article supplement (doi:10.1039/c0mt00027b), 2010-01-01
Supplement: c0mt00027b.pdf [file c0mt00027b.pdf]

## Supplementary Information

### Zinc release of Zn<sub>7</sub>-metallothionein-3 induces fibrillar type amyloid-β aggregates

Jade Durand<sup>a,b,d</sup>, Gabriele Meloni<sup>c,e</sup>, Christine Talmard<sup>a,b</sup>, Milan Vašák<sup>c</sup>, Peter Faller<sup>a,b</sup>

<sup>a</sup> CNRS ; LCC (Laboratoire de Chimie de Coordination) ; 205, route de Narbonne, F-31077 Toulouse, France

<sup>b</sup> Université de Toulouse ; UPS, INPT ; LCC ; F-31077 Toulouse, France

<sup>c</sup> Department of Biochemistry, University of Zürich, Winterthurerstrasse 190, CH-8057 Zürich, Switzerland

<sup>d</sup> Present address: IPBS, 205, route de Narbonne, F-31077 Toulouse

<sup>e</sup> Present address : Division of Chemistry and Chemical Engineering, and Howard Hughes Medical Institute, California Institute of Technology, 114-96, Pasadena, CA 91125, USA

### Materials and Methods

*Zn<sub>7</sub>MT-3 sample*: Zn<sub>7</sub>MT-3 was produced recombinantly as described<sup>1</sup>. The stock solutions were prepared by dissolving Zn<sub>7</sub>MT-3 in water. For all experiments, the peptide solutions were buffered at pH 7.4 in 20 mM 4-(2-hydroxyethyl)-1-piperazineethane-sulfonic acid (HEPES), containing 20 mM NaCl. Zn<sub>7</sub>MT-3 samples were stored at -20°C. The Zn<sub>7</sub>MT-3 concentration was determined by absorption spectroscopy, by using the extinction coefficient of the peptide bond at 220 nm ( $\epsilon = 53\,000 \text{ M}^{-1}\text{cm}^{-1}$  at pH 2 in 10 mM HCl and at room temperature).<sup>2</sup> The sample concentrations were verified by measuring the reduced Cys concentration, via the 2,2'-dithiopyridine (DTP) test<sup>3</sup>. Stock solution of 3mM DTP containing 100 mM EDTA at pH 4 was mixed with the samples containing 20 $\mu$ M MT-3 (buffer : HEPES 20mM, NaCl 20mM, pH 7,4) with H<sub>2</sub>O to achieve a final concentration of 0.4  $\mu$ M MT-3 and 300  $\mu$ M DTP. The pH was adjusted to pH 7.4 with 1M NaOH. Then absorbance at 343 nm, corresponding to the absorbance of the characteristic final product 2-pyridinethiolate ( $\epsilon = 7600 \text{ M}^{-1}\text{cm}^{-1}$ ), was measured after five minutes of sample incubation at room temperature.

*Aβ peptide sample:* The amyloid-β(1-40) peptide (Aβ<sub>40</sub>) was synthesized by standard F-MOC chemistry (*Genscript*). The stock solutions were prepared by dissolving the peptides in water and centrifuged to remove aggregates. The supernatant was recovered and its peptide concentration determined by absorption spectroscopy using the molar extinction coefficient of single tyrosine at 276 nm ( $\epsilon = 1410 \text{ M}^{-1}\text{cm}^{-1}$ , pH = 7.4, room temperature)<sup>4</sup>.

*Absorption spectroscopy:* UV/Visible absorption spectra were obtained with an *Agilent 8453 Hewlett Packard* spectrometer, at room temperature, with use of a 1 cm pathlength quartz cuvette. Turbidity was measured at 300 nm.

*Zincon measurements:* Zn<sup>2+</sup> release from Zn<sub>7</sub>MT-3 was measured by using the complexing dye zincon. Upon Zn<sup>2+</sup> binding the Zn<sup>2+</sup>-zincon complex shows a band at 620 nm with an extinction coefficient of  $23'200 \text{ M}^{-1}\text{cm}^{-1}$ <sup>5</sup>. Zn<sup>2+</sup> concentration was estimated by using the difference absorption at 620 nm between the Zn<sup>2+</sup>-zincon complex and zincon. In the time course of Zn<sup>2+</sup> release from Zn<sub>7</sub>MT-3, the difference absorption between 620 and 800 nm of the buffer was used to account for baseline shifts over time.

*Mass spectrometry:* Positive mode ESI-MS spectra were recorded on an *API-365* quadrupole mass spectrometer (Perkin-Elmer Sciex) from 800 – 2500 Da. The Zn<sub>7</sub>MT-3 samples were prepared at a concentration of 40 μM and incubated with 0, 40 or 200 μM H<sub>2</sub>O<sub>2</sub> for 1 day at room temperature. Then, the samples were diluted by a factor of two with H<sub>2</sub>O/acetonitrile (50% v/v) containing 0.1% formic acid. At the resulting pH 3, Zn<sup>2+</sup> is released from Zn<sub>7</sub>MT-3 and the apo-protein generated. Normally the peaks according to the 4+, 5+ and 6+ charged apo-MT-3 were well detected. Data acquisition and processing were performed with the *Analyst* software.

*Size-exclusion chromatography:* 20 μM Zn<sub>7</sub>MT-3 peptide solutions were incubated with 0, 20, 100 or 200 μM H<sub>2</sub>O<sub>2</sub> for one day and centrifuged. Different forms of ZnMT-3 obtained in the supernatant were separated by an AKTA Instrument (Amersham) using an Amersham Biosciences Superdex 75 10/300 GL size exclusion column (300 x 10 mm) eluted under isocratic conditions, at room temperature. ZnMT-3 elution was monitored at 220 nm and protein samples collected. At the same time, a 20μM solution of ZnMT-3 without H<sub>2</sub>O<sub>2</sub> was also analyzed as a control.

*ThT fluorescence:* ThT binding assays were performed with a Safas Monaco SP 2000 spectrofluorimeter using a ninety-six-well plate. The final volume of 200 μl containing 30 μM Aβ<sub>40</sub>, 20 μM Zn<sub>7</sub>MT-3 and 0 or 100 μM H<sub>2</sub>O<sub>2</sub> was incubated for one day. ThT (1 mM stock solution in water) was added to reach a final concentration of 10 μM. The fluorescence

spectra of ThT were obtained at room temperature employing excitation wavelength of 435 nm and emission wavelength of 482 nm. As a control, an aqueous solution of ZnSO<sub>4</sub> was used for Zn<sup>2+</sup> addition.

*Transmission electron microscopy:* Solution of 30 μM Aβ were added to 20 μM Zn<sub>7</sub>MT-3 and incubated with 0 or 100 μM of H<sub>2</sub>O<sub>2</sub> for one day at room temperature. Samples (5 μL) were deposited on electron microscopy grids, washed with 5 μL of Milli-Q water, and negatively stained with an aqueous solution (5 μL) of uranyl acetate (1% w/w). Samples were air-dried and examined with a JEOL 1011 transmission electron microscope operating at an accelerating voltage of 100 kV. Numeric pictures acquisition was realized by the *ITEM* program. Samples were Abate; Aβ with ZnSO<sub>4</sub>; Aβ (30 μM) with Zn<sub>7</sub>MT-3; and Aβ, Zn<sub>7</sub>MT-3 and H<sub>2</sub>O<sub>2</sub>. Concentrations Aβ (30 μM), ZnSO<sub>4</sub> (30 μM), Zn<sub>7</sub>MT-3 (20 μM) and H<sub>2</sub>O<sub>2</sub> (100 μM).

## References

1. P. Faller, D. W. Hasler, O. Zerbe, S. Klauser, D. R. Winge and M. Vasak, *Biochemistry*, 1999, **38**, 10158-10167.
2. G. Meloni, T. Polanski, O. Braun and M. Vasak, *Biochemistry*, 2009, **48**, 5700-5707.
3. A. O. Pedersen and J. Jacobsen, *Eur. J. Biochem.*, 1980, **106**, 291-295.
4. L. Guilloreau, L. Damian, Y. Coppel, H. Mazarguil, M. Winterhalter and P. Faller, *J. Biol. Inorg. Chem.*, 2006, **11**, 1024-1038.
5. C. Talmard, A. Bouzan and P. Faller, *Biochemistry*, 2007, **46**, 13658-13666.
